# Supplementary material for: Prolonged SARS-CoV-2 infection in patients with lymphoid malignancies
Source: bioRxiv or medRxiv preprint supplement (doi:10.1101/2021.08.25.21262417), 2021-08-29
Supplement: Supplementary file [file media-2.pdf]

**A**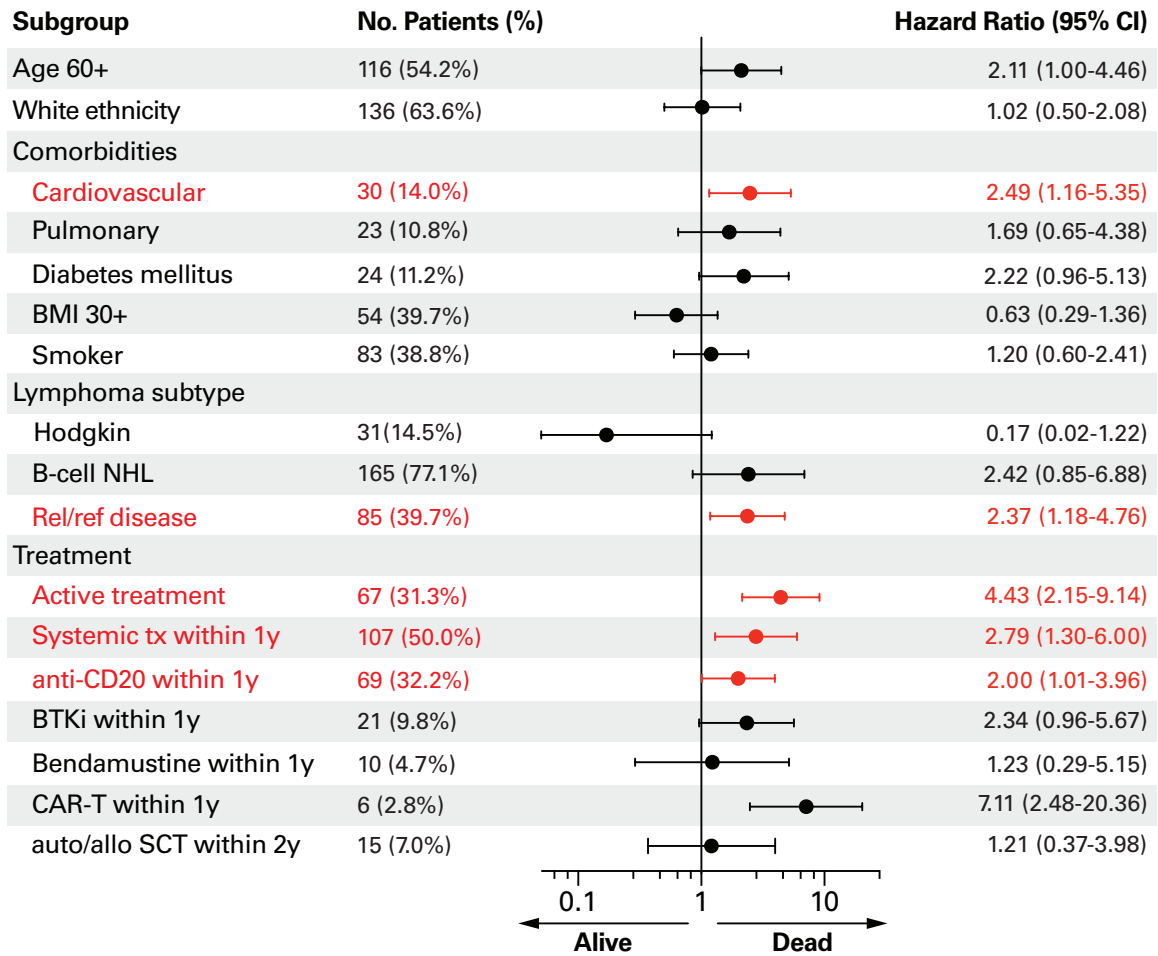**B**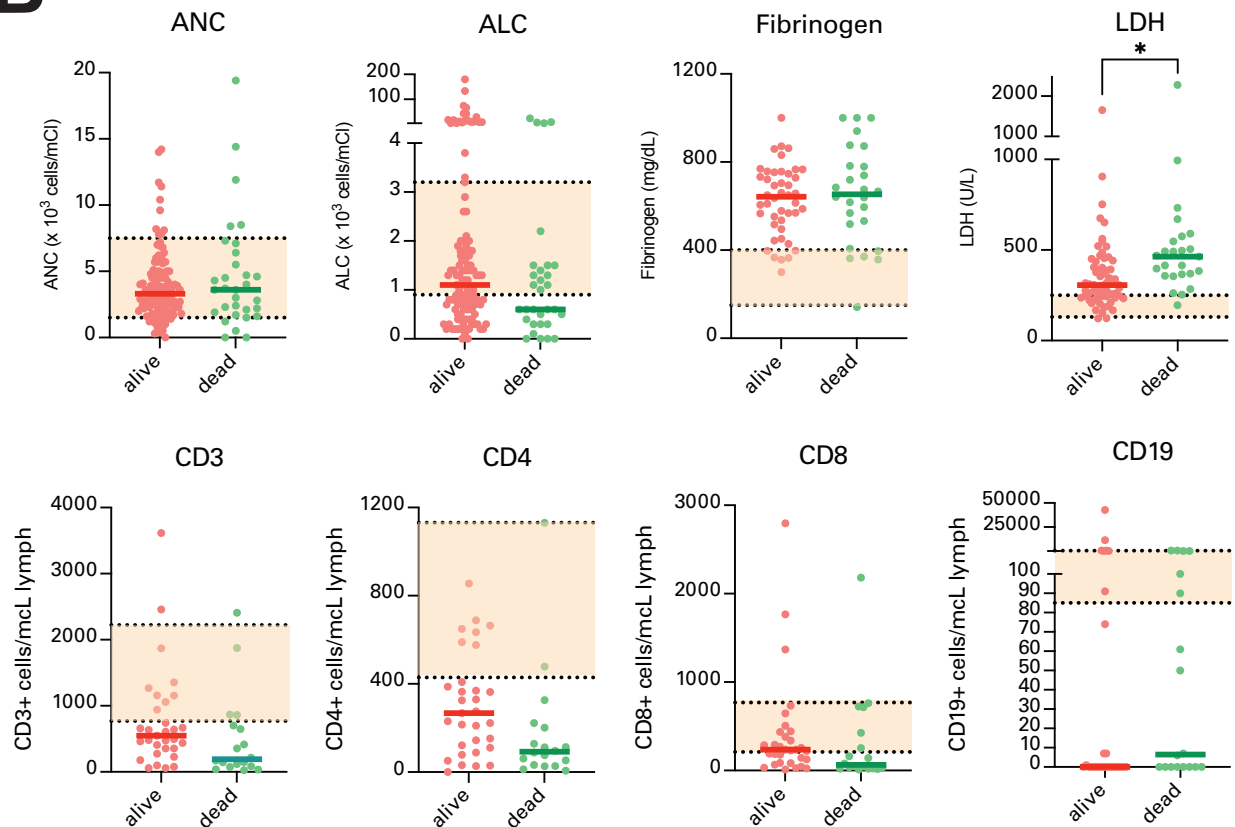



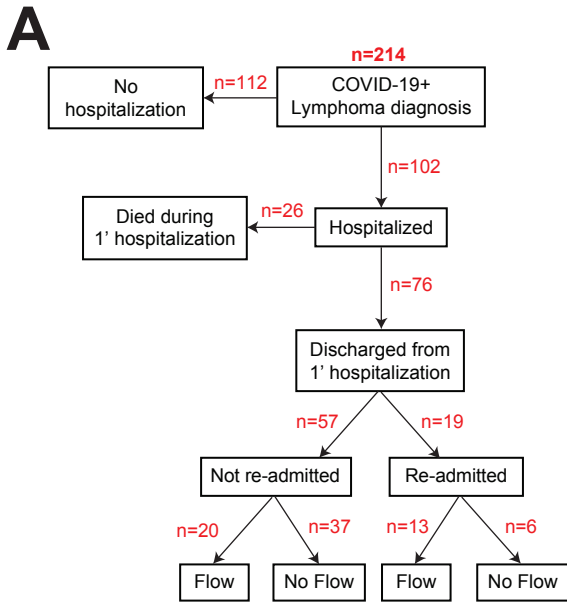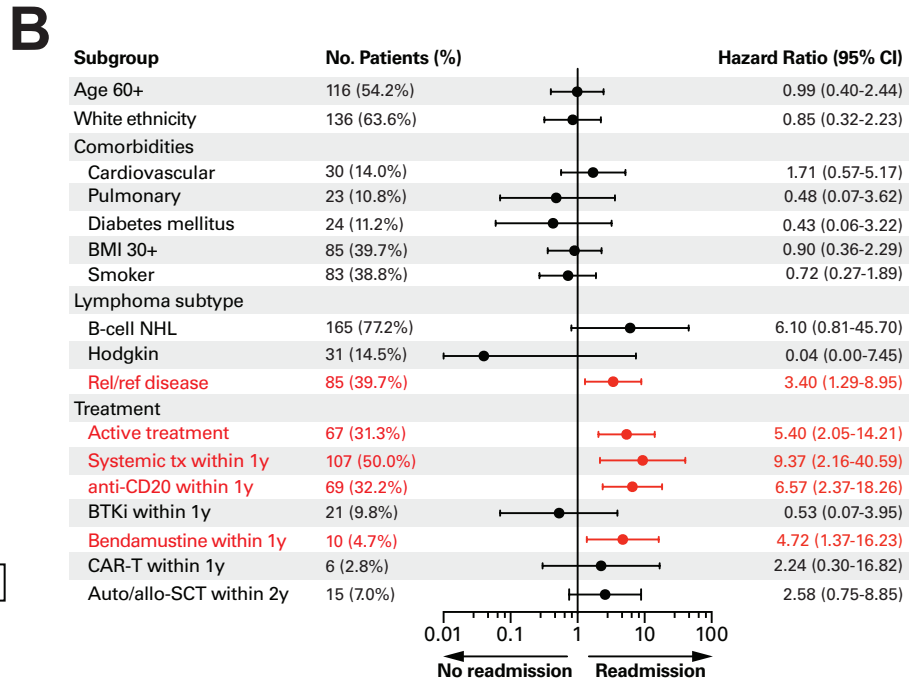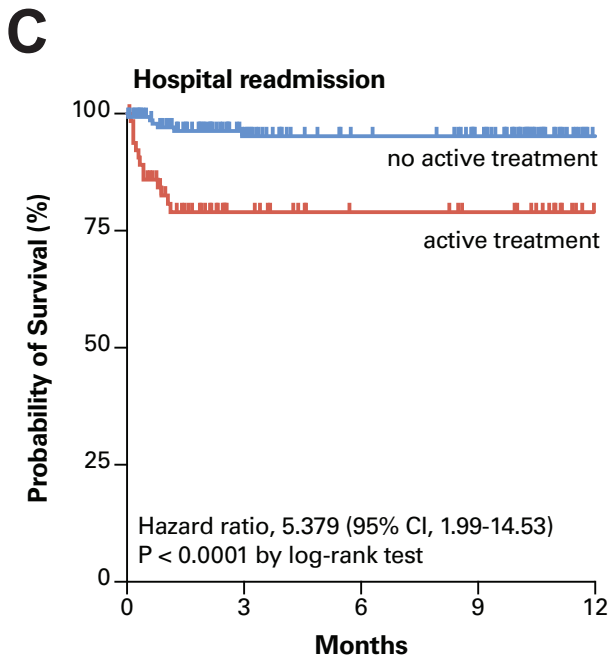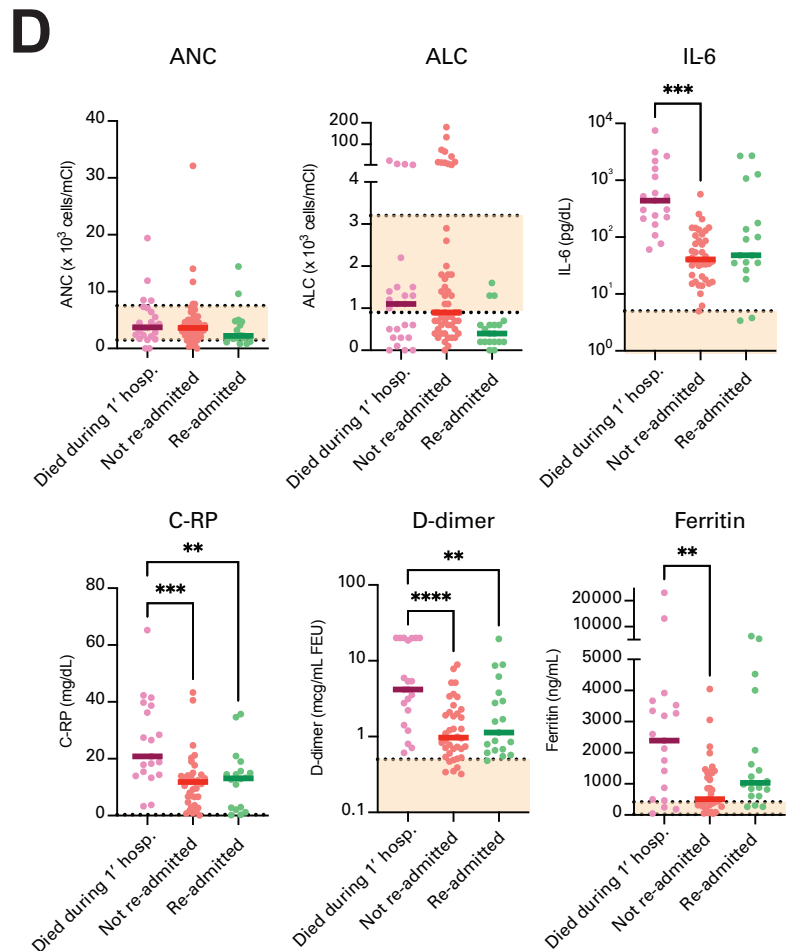

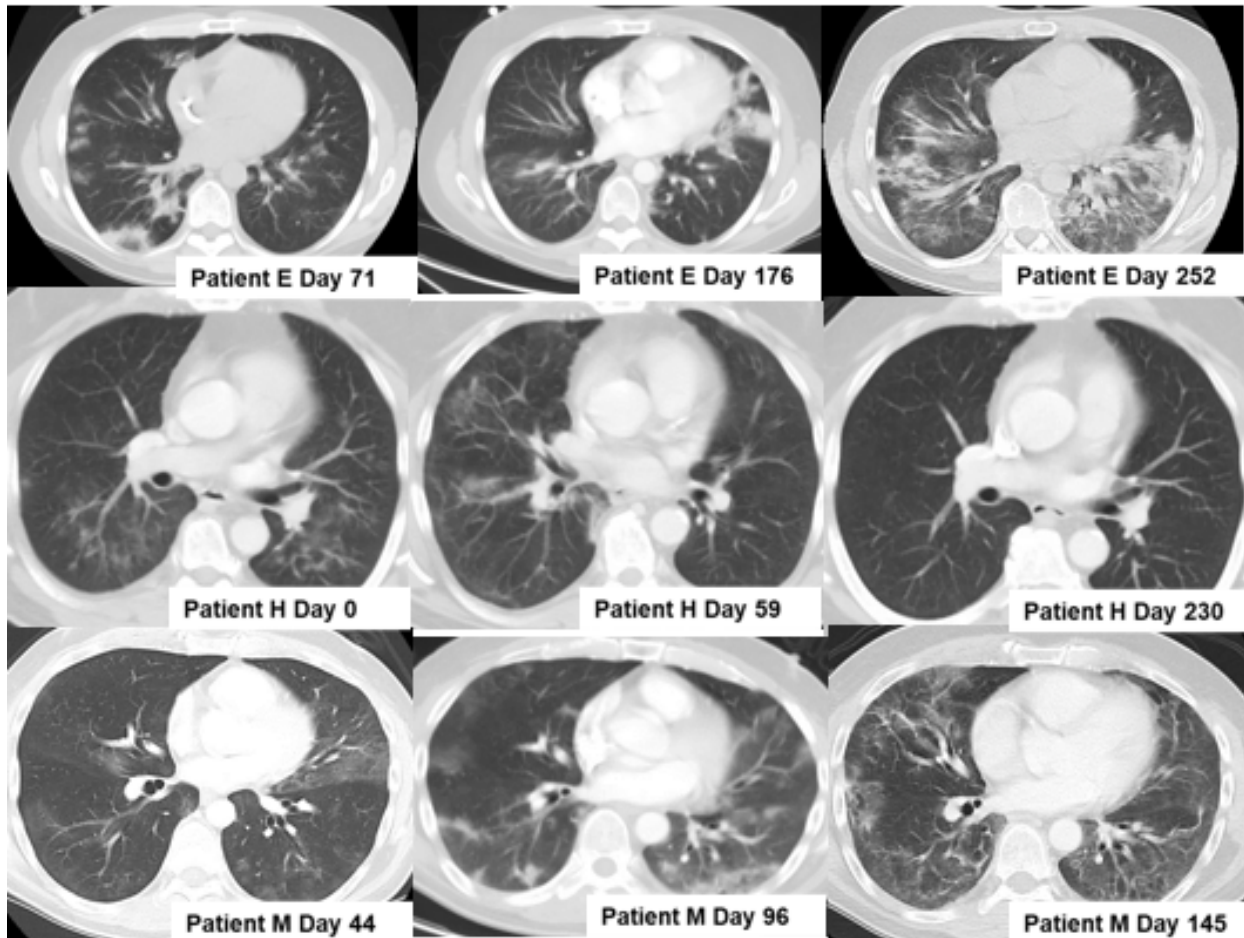

Supplementary Figure 4.
